RESEARCH ARTICLE

# Antimicrobial potentials of *Pandanus amaryllifolius* Roxb.: Phytochemical profiling, antioxidant, and molecular docking studies

Dwi Kusuma Wahyuni<sup>1\*</sup>, Gita Aqila Nuha<sup>1</sup>, Tope Gafar Atere<sup>2</sup>, Viol Dhea Kharisma<sup>1</sup>, Vinaya Satyawati<sup>1</sup>, Cici Tya Rahmawati<sup>1</sup>, Ahmad Affan Ali Murtadlo<sup>1</sup>, Alvi Jauharotus Syukriya<sup>3</sup>, Sumrit Wacharasindu<sup>4</sup>, Sehanat Prasongsuk<sup>5</sup>, Hery Purnobasuki<sup>1</sup>

**1** Department of Biology, Faculty of Science and Technology, Universitas Airlangga Surabaya, Surabaya, East Java, Indonesia, **2** Department of Medical Biochemistry, College of Health Sciences, Osun State University, Osogbo, Nigeria, **3** Program in Biotechnology, Faculty of Science, Chulalongkorn University, Bangkok, Thailand, **4** Department of Chemistry, Faculty of Science, Chulalongkorn University, Bangkok, Thailand, **5** Plant and Biomass Utilization Research Unit, Department of Botany, Faculty of Science, Chulalongkorn University, Bangkok, Thailand

\* [dwi-k-w@fst.ac.id](mailto:dwi-k-w@fst.ac.id)

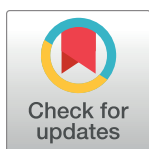

## OPEN ACCESS

**Citation:** Wahyuni DK, Nuha GA, Atere TG, Kharisma VD, Tari VS, Rahmawati CT, et al. (2024) Antimicrobial potentials of *Pandanus amaryllifolius* Roxb.: Phytochemical profiling, antioxidant, and molecular docking studies. PLoS ONE 19(8): e0305348. <https://doi.org/10.1371/journal.pone.0305348>

**Editor:** Mozaniel Santana de Oliveira, Museu Paraense Emilio Goeldi, BRAZIL

**Received:** January 7, 2024

**Accepted:** May 28, 2024

**Published:** August 14, 2024

**Copyright:** © 2024 Wahyuni et al. This is an open access article distributed under the terms of the [Creative Commons Attribution License](https://creativecommons.org/licenses/by/4.0/), which permits unrestricted use, distribution, and reproduction in any medium, provided the original author and source are credited.

**Data Availability Statement:** All relevant data are within the manuscript and its [Supporting Information](#) files.

**Funding:** The present study was funded by Scheme of International Research Collaboration TOP #300 Universitas Airlangga fiscal year 2022 (Grant No. 176/UN3.15/PT/2022). Funds were received by Assist. Prof. Dr. Dwi Kusuma Wahyuni and Assoc. Prof. Dr. Sehanat Prasongsuk. The funders had no role in study design, data collection

## Abstract

The emergence of antimicrobial resistance has led to an urgent need for novel antimicrobial drugs. This study aimed to determine the antioxidant and antimicrobial potentials *in silico* and *in vitro* of *Pandanus amaryllifolius* Roxb. ethanolic extract. The extracts were subjected to gas chromatography-mass spectrometry (GC-MS) analysis to identify the compounds. *In silico* antimicrobial studies were performed to gain insights into the possible mechanism of action of the active compounds as antimicrobials. The antimicrobial activities of the ethanolic extracts were assessed using the agar well diffusion method against the Surabaya strain of *Escherichia coli* and *Staphylococcus aureus*. Antioxidant properties of the extract were done using DPPH (2,2-diphenyl-1-picryl-hydrazyl-hydrate) and ABTS [2,2'-azino-bis (3-ethylbenzthiazoline-6-sulphonic acid)] inhibition assays. The phytochemical screening revealed that the extract has high flavonoids and polyphenols contents. The GC-MS analysis detected the presence of 52 bioactive substances, with *n*-hexadecanoic acid, 9, 12, 15-octadecatrienoic acid, benzofuran 2,3-dihydro-, quinic acid, neophytadiene as major compound. Molecular docking studies showed that these compounds have a high binding affinity towards the target proteins, thereby inhibiting their activities. The ethanolic extract of *P. amaryllifolius* Roxb. exhibited antioxidant and antimicrobial activities. The IC<sub>50</sub> were 11.96 ± 4.01 µg/ml and 26.18 ± 7.44 µg/ml for DPPH and ABTS. The diameters of inhibition zones (DIZ) and percentage of inhibition (PI) were calculated and varied for every single pathogen 16.44 ± 1.21mm/66.76 ± 4.92% (50%) and 21.22 ± 0.11mm/82.49 ± 3.91% (50%) for *E. coli* and *S. aureus* (DIZ/PI) respectively. Overall, this study provides information on the mechanism responsible for *P. amaryllifolius* Roxb. extract as a natural antimicrobe and lays the foundation for further studies to isolate and characterize the active compounds as antimicrobial candidates.

and analysis, decision to publish, or preparation of the manuscript.

**Competing interests:** The authors have declared that no competing interests exist.

## Introduction

Antimicrobial resistance (AMR) severely impacts the foundation of contemporary medicine and the viability of an efficient, worldwide healthcare response to the persistent threat posed by infectious diseases [1–3]. The quest for novel and potent antimicrobial drugs is urgently required since antimicrobial resistance has turned into a worldwide health problem.

With the frustratingly slow development of new medications and pharmaceutical company investment, the abuse of antimicrobials like antibiotics has become a significant problem for both medicine and agriculture [4]. By 2050, according to O'Neill (2016), AMR will lead to death of 10 million population per year surpassing cancer as the leading cause of death. This unsettling prediction and current trend in AMR has motivated researchers to isolate and discover new bioactive compounds from plants that targeted against microbial resistance [5] also notably given that around 50% of existing pharmaceuticals and nutraceuticals are naturally derived products [6, 7].

The historic usage of plants to cure a variety of illnesses, including infectious diseases, and their potential as a source of novel antimicrobial agents [8]. Moreover, chemically complex substances have excellent therapeutic potential since they have less adverse effects than manufactured medications and also have a low likelihood of acquiring resistance [9]. Around 1,340 floras have been identified for specific antibacterial properties, and >30,000 antimicrobial chemicals have been extracted from various plant species [6]. In the battle against AMR, herbal remedies have proven to be an effective tool that may be used alone or in conjunction with existing antibiotic strategies [4]. *Pandanus amaryllifolius* Roxb. ex Lindl. is indigeneous and widely available in Indonesia. Using indigeneous plants for extraction of essentials for betterment of lives is the sustainable approach to achieve sustainable development goals (SDGs) [10].

Many substances, including alkaloids, phenols, spermidine, rutin, quercetin, tocopherol, and carotenoids, have been identified as being present in plants and contributing to their antibacterial potentials [6, 11]. The antibacterial activities of *Discopodium penninervium* Hochst., *Lippia adoensis* Hochst., *Polysphaeria aethiopica* Verdc., *Euphorbia depauperata* Hochst., *Cucumis pustulatus* Hook.f., *Sonchus arvensis* L., *Pluchea indica* L., *Cosmos caudatus* L., *Achillea millefolia* L., *Pterocarpus macrocarpus* Kurz., and *Rumex abyssinicus* Jacq. are due to the presence of alkaloids, polyphenols, tannins, terpenoids, flavonoids, cardiac glycoside and saponins [2, 3, 12–15].

A plant from the Pandanaceae family that is mostly found in Southeast Asian countries, Pandan has been utilized for traditional medicine and ethnobotanical products [16]. Because of their distinctive and pleasant scent, pandan leaves are frequently used in Southeast Asia to flavor a variety of foods, including baked goods, desserts, and even home cooking. The only *P. amaryllifolius* Roxb. species with fragrant leaves is remaining to the chemical 2-acetyl-1-pyrroline (2AP), which is responsible for the perfume. Several studies have shown that *P. amaryllifolius* Roxb. is a great source of phenolic and flavonoid chemicals. Several studies have found that the leaves and roots of *P. amaryllifolius* Roxb. contain bioactive substances such phenolic compounds and flavonoids, which function as antioxidants and may scavenge free superoxide radicals [16, 17].

In an effort to discover and explore the bioactivity compounds which can be antimicrobial agent candidate, there has been an increasing interest in examining the possible antibacterial activity of *P. amaryllifolius* Roxb. and its components [16, 18]. This present study intended to explore the antioxidant and antimicrobial potential of *P. amaryllifolius* Roxb. ethanolic extract by evaluating its activity *in silico* and *in vitro* methods. The findings could provide valuable outcome for understanding the pharmaceutical potential of *P. amaryllifolius* Roxb. as a source

of new antioxidant and aid in the development of innovative therapies for the treatment of infectious diseases. Moreover, this study is well contributing to about 5 Sustainable Development Goals (SDGs 17): viz. good health and well-being, sustainable cities and communities, quality education, life on land, and responsible consumption and production etc. designed and adopted to serve as a "*shared blueprint for peace and prosperity for people and the planet, now and into the future.*" in 2015.

## Materials and methods

### Collection and authentication of plant material

*Pandanus amaryllifolius* Roxb. was collected from Taman Husada Graha Famili (Plant Medicinal Garden) Surabaya, East Java, Indonesia (7°18'12.2"S 112°41'12.7"E). The healthy and green leaves sample without indications of insect or microbial damage were collected from the site. The sample plant material was authenticated by the Purwodadi Botanical Garden (Indonesian Institute of Sciences, Jakarta, Indonesia). The voucher specimen was placed in the Plant Systematics Laboratory, Department of Biology, Faculty Science and Technology Universitas Airlangga, Indonesia with reference No. PA.0116022023.

### Sample extraction

The leaves of *P. amaryllifolius* Roxb. were allowed to dry in open air and then ground into a powder with electric grinder and sieved by using 60-mesh size sieves. Each 100 g of powder was separately soaked with ethanol for 24 hrs at room temperature ( $28 \pm 2^\circ\text{C}$ ), same procedure was repeated thrice subsequently, followed by filtration with filter paper (pore diameter 110 mm); Merck KGaA, Darmstadt, Germany, and the filtrate obtained was evaporated in a rotary evaporator at  $60^\circ\text{C}$  to acquire crude extracts. The volume of the extract (w/w) was measured before storage at  $4^\circ\text{C}$  in the refrigerator [2, 15].

### Phytochemical profiling by gas chromatography-mass spectrometry (GC-MS)

Gas chromatography-mass spectrometry (GC-MS) analysis was done by using "Agilent Technologies". The specification of GC-MS was agilent technologies model 19091N-136HP-INNO-Wax, 5% phenyl methyl silox agilent technologies, Initial temperature was  $150^\circ\text{C}$  held for 2 min, final temperature was  $260^\circ\text{C}$  at the rate of  $20^\circ\text{C}/\text{min}$ , 1  $\mu\text{l}$  of 0.2 g/ml fraction was injected. Temperature of heater was  $300^\circ\text{C}$ , pressure was 27, 213psi, column (60mol/L  $\times$  250 $\mu\text{mol/L}$   $\times$  0.25 $\mu\text{mol/L}$ ) and carrier gas (helium, 99.9999% purity, flow rate = 1,7583mL/min; average velocity was 34,171cm/sec). The constituents of compounds were compared with the retention times and mass spectrum of the samples obtained using gas chromatography with the mass spectra from the National Institute of Standards and Technology (NIST) Version 14MS database library [3, 19].

### In silico antimicrobial activity

**Ligand retrieval.** Ligand from *P. amaryllifolius* Roxb. ethanol leaves in this study refers to the results of GC-MS. GC-MS data showed fifty-two compounds from *P. amaryllifolius* Roxb. 3D structure of ligand, Collision induced dissociation (CID), formula, molecular weight (g/mol), and SMILE Canonical obtained from PubChem database (<https://pubchem.ncbi.nlm.nih.gov/>). Structure optimization and energy minimization of the ligands were performed through Open Babel v2.3.1 to obtain the PDB file [2, 20, 21].

**Protein preparation.** Target proteins from microorganisms for identification of antimicrobial activity through a computational approach consist of *Bacillus subtilis*—FtsZ, *Candida albicans*—acetoxyhydroxyacid synthase (AHAS), *Escherichia coli*—Rhomboid Protease (Rpro), and *Staphylococcus aureus*—Sortase A (SA). The RCSB database (<http://www.rcsb.org/pdb/home/home.do>) was used for retrieval of the four target proteins with the program database (pdb) file. Water molecules and native ligands are removed from targets through PyMol v2.5 software [3, 22, 23].

**Drug likeness prediction.** The similarity of drug properties from query compounds in this study was identified through drug likeness analysis. Lipinski Rule of Five from SCFBio server (<http://www.scfbio-iitd.res.in/software/drugdesign/lipinski.jsp>) was used for the drug like-molecule assessment in this study. Parameters including molecular mass, high lipophilicity (LOGP), hydrogen bond acceptors-donors, and molar refractivity are considered as determinants of the drug like-molecule properties of the query compound [24, 25].

**Virtual screening.** The method used to identify activity from query compound by referring to interactions on targets through a computational approach is virtual screening. The type of virtual screening method used in this study is molecular docking. The Docking study mainly aims to identify the antimicrobial potential of *P. amaryllifolius* Roxb. Compounds from *P. amaryllifolius* Roxb. extract act as ligands and targets are proteins from microbes such as *Bacillus subtilis*—FtsZ, *Candida albicans*—AHAS, *Escherichia coli*—Rhomboid Protease (Rpro), and *Staphylococcus aureus*—Sortase A (SA). PyRx v0.9.9 software was performed to simulate ligand-protein docking [25, 26]. The docking grid in this study consist FtsZ—RCSB ID: 2VAM—*Bacillus subtilis* Center (Å) X:28.973 Y:-8.976 Z:-1.975 Dimensions (Å) X:67.136 Y:62.079 Z:71.526, AHAS—RCSB ID: 6DEK—*Candida albicans* Center (Å) X:56.869 Y:246.767 Z:46.576 Dimensions (Å) X:80.320 Y:59.015 Z:74.313, Rpro—RCSB ID: 3ZMI—*Escherichia coli* (Å) X:15.820 Y:-9.206 Z:42.649 Dimensions (Å) X:47.082 Y:51.738 Z:46.252, SA—RCSB ID: 2MLM—*Staphylococcus aureus* (Å) X:16.421 Y:12.281 Z:11.952 Dimensions (Å) X:48.928 Y:53.323 Z:39.169.

**Ligand-protein interaction.** In the present study, the molecular interactions were identified with the help of Discovery Studio 2016 software. Weak bond interactions can be identified in ligand-protein complexes such as hydrogen, van der Waals, hydrophobic, and pi/alkyl. These interactions serve to trigger activity such as an inhibitory response on the target [27, 28].

**3D molecular visualization.** Molecular complexes exhibited through PyMol v2.5 software with coloring and structural selection methods. Transparent surfaces and sticks are selected for visualization. Color selection refers to the type of atom and 3D representation [22, 29].

## In vitro antioxidant activity

**The DDPH (2,2-diphenyl-1-picryl-hydrazyl-hydrate) inhibition assay.** The DPPH (2,2-diphenyl-1-picryl-hydrazyl-hydrate) inhibition assay was carried out in concurrence of Prieto (2012) and Wahyuni et al. (2023) with required modifications. During analysis 100 µl samples at different concentrations from 1.075 to 200 µg/ml in ethanol were added to 100 µl DPPH reagent (0.2 mM) and incubated for 30 min at room temperature (28±2°C), these mixtures are further used as samples [2, 30]. Whereas, Ascorbic acid (reference standard) was positive control in the experiment. The resulting absorbance was measured at wavelength 517 nm by using microplate reader (Thermo Scientific, USA). Furthermore, the percentage of sample inhibition was calculated by using following Formula (1):

$$\% \text{ Inhibition} = (A \text{ control} - A \text{ sample}) / A \text{ control} \times 100\% \quad (1)$$

Where 'A sample' is the absorbance of sample (the mixture of DPPH reagent and sample), whereas, 'A control' is the absorbance of only reference standard. The percentage of inhibition at all concentrations were plotted and linear regression analysis was carried out for determination of the half-maximal inhibitory concentration ( $IC_{50}$ ) value.

**The ABTS [2,2'-azino-bis (3-ethylbenzthiazoline-6-sulphonic acid)] inhibition assay.** The ABTS [2,2'-azino-bis (3-ethylbenzthiazoline-6-sulphonic acid)] inhibition assay was performed as per the method illustrated by Fu et al. (2022) and Wahyuni et al. (2023). However, the ABTS reagent was prepared by adding 7 mM ABTS solution with 2.4 mM potassium persulphate solution and mixed well, then stored at room temperature ( $28 \pm 2^\circ\text{C}$ ) for 12–16 hours in the dark place. After the waiting period, the absorbance of the solution at wavelength 734 nm was measured (stock solution diluted to obtain absorbance between 0.7–0.72). 100  $\mu\text{L}$  sample at different concentrations from 1.075 to 200  $\mu\text{g}/\text{mL}$  in ethanol were mixed with 100  $\mu\text{L}$  of ABTS reagent. Whereas, trolox and ascorbic acid were used as positive control (reference standard). After incubating for 5 mins in the dark place at room temperature ( $28 \pm 2^\circ\text{C}$ ), the absorbance was assessed at wavelength 734 nm by using microplate reader (Thermo Scientific, USA). The percent inhibition and  $IC_{50}$  value were calculated by using same Formula 1 as given above [2, 31].

**Antimicrobial activity.** The antimicrobial activity was analyzed by using agar well diffusion method against selected gram-positive bacteria and gram-negative bacteria viz. *Staphylococcus aureus* and *Escherichia coli* respectively [2, 3]. Both bacteria were isolated from Surabaya City, East Java, Indonesia. Nutrient agar media was used to culture test microorganism. Whereas, potato dextrose agar was used for cultivating the microbes. The 30 mL sterilized agar medium was used to pour into presterile petri plates with 10cm diameter and all plates are allowed to solidify. Then 100  $\mu\text{L}$  of inoculate with optical density (OD) 0.1 from each selected strain was spread on the solidified agar plates carefully with the help of glass spreader. On the other side a stock solution of plant extract was prepared and diluted serially (25% and 50%). The well of 5 mm diameter, was made in solidified medium in petri plates with the help of a cork borer. Whereas 20% of dimethyl sulfoxide (DMSO) and Chloramphenicol were used as negative control, and positive control respectively. All wells were filled with 30  $\mu\text{L}$  of prepared extract and control accordingly in respective agar petry plates. All plates are incubated for 24 hrs at  $37^\circ\text{C}$ , and antimicrobial activity was assessed and diameter of the inhibition zone (DIZ) was measured around the wells in the nutrient agar medium. The percentage of inhibition i.e. PI was calculated as by using Formula (2):

$$\text{PI} = \frac{\text{The inhibition zone of the sample (cm)}}{\text{The zone of positive control (cm)}} \times 100\% \quad (2)$$

**Data analysis.** Data are given as the mean  $\pm$  standard deviation. The  $IC_{50}$  values for *in vitro* antioxidant and linear regression studies was carried out by using Microsoft Excel version 20.0 (The Microsoft Corporation, Redmond, Washington, USA).

## Results and discussion

### Phytochemical profiling

**The yield of extract.** The yield of ethanolic extract of *Pandanus amaryllifolius* Roxb. was 16.24 g. According to preliminary phytochemical analysis, ethanol extract *P. amaryllifolius* Roxb. leaves contained high amounts of flavonoid and polyphenols, and moderate level of alkaloid and terpenoids. However, saponin was not detected in the ethanol extract as shown in S1 Table. Flavonoids and polyphenols are well known for their antioxidant and anti-inflammatory properties [32]. Alkaloids and terpenoids have also been shown to have several biological



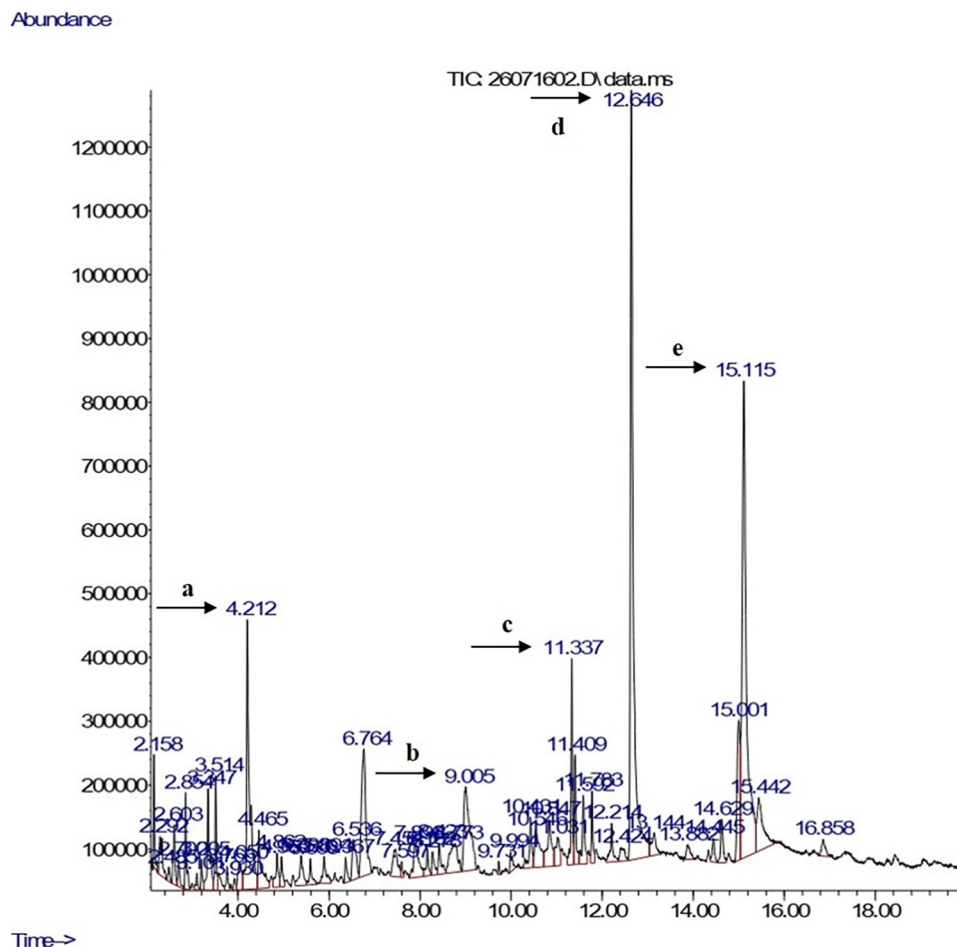

**Fig 1.** The gas chromatogram of the constituent compounds from the ethanol extract of *Pandanus amaryllifolius* Roxb. leaves. Numbered arrow showed the major compound of the extract with (a) benzofuran 2,3-dihydro-; (b) quinic acid; (c) neophytadiene; (d) *n*-hexadecanoic acid; (e) 9, 12, 15-octadecatrienoic acid.

<https://doi.org/10.1371/journal.pone.0305348.g001>

activities including anti-inflammatory, anticancer, and antimicrobial properties [33]. The absence of saponins in the ethanol extract is an indication that it may not have any cholesterol-lowering properties [34]. The GC-MS analysis was carried out for the identification of the specific compounds that responsible for antimicrobial properties of the extract.

**Gas chromatography-mass spectrometry (GC-MS) analysis.** The gas chromatogram of the constituent compounds from the ethanol extract is shown in Fig 1. The GC-MS analysis strongly supported to find 52 bioactive compounds. The active principles with their respective retention time (RT) and concentration (peak area %) are given in S2 Table. The chromatogram showed that compound contained *n*-hexadecanoic acid (19.31%); 9,12,15-octadecatrienoic acid (17.82%); and benzofuran, 2,3-dihydro- (6.84%) as major compound. Therefore, the compounds were shown to have antimicrobial activity based on the references [2, 3].

### *In silico* antimicrobial activity

**Ligand retrieval and protein preparation.** The compounds from *P. amaryllifolius* Roxb. were attained from the PubChem database (<https://pubchem.ncbi.nlm.nih.gov/>), which provides information consisting of compound name, Collision-induced dissociation (CID),

formula, structure data format (sdf) file, and SMILE Canonical in Table 1. SMILE Canonical and sdf file were used as input data for identifying drug-like molecules from *P. amaryllifolius* Roxb. through Lipinski's Rule of Five. The protein samples used in this study consisted of FtsZ—*Bacillus subtilis* (RCSB ID: 2VAM), acetohydroxyacid synthase (AHAS)—*Candida albicans* (RCSB ID: 6DEK), rhomboid protease (Rpro)—*Escherichia coli* (RCSB ID: 3ZMI), and Sortase A (SA)—*Staphylococcus aureus* (RCSB ID: 2MLM), which were obtained from RCSB (<http://www.rcsb.org/pdb/home/home.do>). *Bacillus subtilis* uses the protein FtsZ to regulate the cell division process, while the AHAS enzyme in *Candida albicans* plays a role in the virulence, invasion, and pathogenicity of the fungus [35, 36]. The activity of Rpro in *Escherichia coli* and SA in *Staphylococcus aureus* as targets for antibiotic binding is essential in the mechanism of bacterial infection in humans [37]. The 3D structure visualization of the targets, consisting of FtsZ, AHAS, Rpro, and SA, was done through PyMol v2.5 using coloring by secondary structure (Fig 2).

**Drug likeness prediction.** Drug-like molecule analysis refers to an evaluation, characterization of a potential drug candidate molecule, and determination of the physicochemical properties of the molecule such as lipophilicity, bioavailability, and stability [38, 39]. This analysis is important for the drug development process because it helps determine the potential of a molecule as an effective drug and minimizes the risk of side effects. Drug likeness analysis in this study aims to determine the drug-like molecule of the query compound. Lipinski Rule's of Five (<http://www.scfbio-iitd.res.in/software/drugdesign/lipinski.jsp>) is used for drug likeness analysis, this method determines drug like-molecule through parameters consisting of molecular mass (D), high lipophilicity (LogP), hydrogen bond donors-acceptors, and molar refractivity. Molecular mass affects the mobility of a drug molecule with a value of  $\leq 500$  D, LogP value must be  $\leq 5$  and the number of hydrogen bonds ( $\leq 5$  donors and  $\leq 10$  acceptors) affects the physicochemical activity and absorption of drug molecules. The activity of drug molecules is also affected by molar refractivity which refers to the ability to induce charge mobility in the target domain with a value of 40–130. All compounds from *P. amaryllifolius* Roxb. leaves extract can act as a drug-like molecule (Table 2). All compounds may trigger specific activities such as inhibition and selective permeable passage to reach the target.

**Virtual screening.** Virtual screening is the application of computational methods such as molecular docking to determine the activity of natural compounds. Molecular docking plays a role in predicting ligand-target interactions [40]. Ligand activity is determined from energy calculations or binding affinity values to understand the mechanism of this molecular interaction. Binding affinity is a negative bond energy formed due to molecular interactions, the binding affinity value must be negative because it increases the ligand-target interaction strength [41, 42]. Binding affinity is influential in the drug development process because it helps determine the potential of a ligand to become an effective drug. Inhibition of drug molecule activity is determined by the binding affinity value [41]. Docking in this study targets to identify antimicrobial activity of *P. amaryllifolius* Roxb. compounds. *P. amaryllifolius* Roxb. compounds act as ligands and targets are protein from microbes consisting of *Bacillus subtilis*—FtsZ, *Candida albicans*—AHAS, *Escherichia coli*—Rhomboid Protease (Rpro), and *Staphylococcus aureus*—Sortase A (SA). Compounds from *P. amaryllifolius* Roxb. consisting of 4-amino-1- $\beta$ -D-ribofuranosyl-2(1H)-pyrimidinone (−7.0 kcal/mol—FtsZ—*Bacillus subtilis*), -Pyrrolidinepropanol,  $\alpha$ -cyclohexyl- $\alpha$ -phenyl (−7.3 kcal/mol—AHAS—*Candida albicans*), (−7.3 kcal/mol—SA—*Staphylococcus aureus*), and (1S,15S)-Bicyclo[13.1.0]hexadecan-2-one (−8.1 kcal/mol—Rpro—*Escherichia coli*) (Table 3) has a more negative binding affinity than other compounds. These three compounds have the potential as inhibitors of protein activity in microbes. Dual inhibitor refers to the activity of a ligand with more negative binding affinity for the two targets [43, 44]. -Pyrrolidinepropanol,  $\alpha$ -cyclohexyl- $\alpha$ -

Table 1. Ligand preparation and information of *P. amaryllifolius* Roxb. compounds from PubChem database.

| No  | Compound                                                                    | CID      | Formula   | SMILE                                         |
|-----|-----------------------------------------------------------------------------|----------|-----------|-----------------------------------------------|
| 1.  | 1,2,3-Propanetriol                                                          | 753      | C3H10O4   | C(C(CO)O)O                                    |
| 2.  | 2(5H)-Furanone, 3-methyl-                                                   | 30945    | C5H6O2    | CC1 = CCOC1 = O                               |
| 3.  | 1H-Azepin-1-amine, hexahydro-                                               | 22198    | C6H14N2   | C1CCCN(CC1)N                                  |
| 4.  | Benzyl Alcohol                                                              | 244      | C7H8O     | C1 = CC = C(C = C1)CO                         |
| 5.  | 3(2H)-Furanone, dihydro-5-isopropyl-                                        | 546095   | C7H12O2   | CC(C)C1CC (= O)CO1                            |
| 6.  | Uracil, 1-N-methyl                                                          | 12009    | C5H6N2O2  | CN1C = CC (= O)NC1 = O                        |
| 7.  | 1,3-Heptadiene, 2,3-dimethyl-                                               | 5370123  | C9H16     | CCCC = C(C)C (= C)C                           |
| 8.  | 3-Ethyl-3-heptanol                                                          | 88241    | C9H20O    | CCCCC(CC)(CC)O                                |
| 9.  | N-Met Ethanol, 2-amino-                                                     | 700      | C2H7NO    | C(CO)N                                        |
| 10. | 4H-Pyran-4-one, 2,3-dihydro-3,5-dihydroxy-6-methyl-                         | 119838   | C6H8O4    | CC1 = C(C (= O)C(CO1)O)O                      |
| 11. | -Pyrrolidinepropanol, .alpha.-cyclohexyl-.alpha.-phenyl-                    | 207840   | C19H29NO  | C1CCC(CC1)C(CCN2CCCC2)(C3 = CC = CC = C3)O.C1 |
| 12. | Furan, 2-ethoxy-2,3-dihydro-4-methyl-                                       | 551516   | C7H12O2   | CCOC1CC (= CO1)C                              |
| 13. | Phenol, 2-ethoxy-                                                           | 66755    | C8H10O2   | CCOC1 = CC = CC = C1O                         |
| 14. | Benzofuran, 2,3-dihydro-                                                    | 10329    | C8H8O     | C1COC2 = CC = CC = C21                        |
| 15. | Benzonitrile                                                                | 7505     | C7H5N     | C1 = CC = C(C = C1)C#N                        |
| 16. | (2,5-Dichlorophenyl) hydrazine                                              | 9366     | C6H6Cl2N2 | C1 = CC (= C(C = C1Cl)NN)Cl                   |
| 17. | 2-(1-Methylideneethyl) cyclopentane-1-carboxaldehyde Dimethyl Acetal isomer | 15178998 | C11H20O2  | CCOC (= O)C1 = C(CC1)C                        |
| 18. | 2H-Pyran, tetrahydro-2-methoxy-                                             | 23057    | C6H12O2   | COC1CCCCO1                                    |
| 19. | 2-Cyanobenzaldehyde                                                         | 101209   | C8H5NO    | C1 = CC = C(C (= C1)C = O)C#N                 |
| 20. | Cyclohexanone, oxime                                                        | 7517     | C6H11NO   | C1CCC (= NO)CC1                               |
| 21. | 2(1H)-Pyrimidinethione, 4,5-diamino-                                        | 3036166  | C4H6N4S   | C1 = NC (= S)NC (= C1N)N                      |
| 22. | 5-Nonanol, 5-methyl-                                                        | 141860   | C10H22O   | CCCCC(C)(CCCC)O                               |
| 23. | 4-amino-1-.beta.-D-ribofuranosyl-2(1H)-pyrimidinone                         | 6175     | C9H13N3O5 | C1 = CN(C (= O)N = C1N)C2C(C(C(O2)CO)O)O      |
| 24. | n-Decanoic acid                                                             | 2969     | C10H20O2  | CCCCCCCCC (= O)O                              |
| 25. | Thieno(3,2-d)isothiazole                                                    | 14024710 | C5H3NS2   | C1 = CSC2 = C1NC (= O)S2                      |
| 26. | 4-Cyclopropylmethylbenzonitrile                                             | 55282712 | C11H12N2  | C1CC1C(C2 = CC = C(C = C2)C#N)N               |
| 27. | 2(4H)-Benzofuranone, 5,6,7,7a-tetrahydro-4,4,7a-trimethyl-                  | 14334    | C11H16O2  | CC1(CC(CC2(C1 = CC (= O)O2)C)O)C              |
| 28. | Dodecanoic acid                                                             | 3893     | C12H24O2  | CCCCCCCCCCCC (= O)O                           |
| 29. | 2,6-Dimethyl-3-(methoxymethyl)-p-benzoquinone                               | 6430513  | C10H12O3  | CC1 = CC (= O)C (= C(C1 = O)C)COC             |
| 30. | 1,7-Azuloquinone                                                            | 9231     | C10H6O2   | C1 = CC = C2C = CC = C2C = C1                 |
| 31. | Quinic acid                                                                 | 6508     | C7H12O6   | C1C(C(C(C(C1(C = O)O)O)O)O)O                  |
| 32. | Patchoulialcohol                                                            | 10955174 | C15H26O   | CC1CCC2(C(C3CCC2(C1C3)C)(C)C)O                |
| 33. | Cyclohexanone, 3-(3-butenyl)-                                               | 566226   | C10H16O   | C = CCCC1CCCC (= O)C1                         |
| 34. | 4-((1E)-3-Hydroxy-1-propenyl)-2-methoxyphenol                               | 91753526 | C10H12O3  | CC = C(C1 = CC (= C(C = C1)O)OC)O             |
| 35. | Tetradecanoic acid                                                          | 11005    | C14H28O2  | CCCCCCCCCCCCC (= O)O                          |
| 36. | (-)-Loliolide                                                               | 100332   | C11H16O3  | CC1(CC(CC2(C1 = CC (= O)O2)C)O)C              |
| 37. | i-Inositol                                                                  | 892      | C6H12O6   | C1(C(C(C(C(C1O)O)O)O)O)O                      |
| 38. | Neophytadiene                                                               | 10446    | C20H38    | CC(C)CCCC(C)CCCC(C)CCCC (= C)C = C            |
| 39. | 2-Pentadecanone, 6,10,14-trimethyl                                          | 10408    | C18H36O   | CC(C)CCCC(C)CCCC(C)CCCC (= O)C                |
| 40. | Pentadecylic acid                                                           | 13849    | C15H30O2  | CCCCCCCCCCCCC (= O)O                          |
| 41. | 2-Hexadecen-1-ol, 3,7,11,15-tetramethyl-, [R-[R*,R*-(E)]]-                  | 5366244  | C20H40O   | CC(C)CCCC(C)CCCC(C)CCCC (= CCO)C              |
| 42. | Hexadecanoic acid, methyl ester                                             | 8181     | C17H34O2  | CCCCCCCCCCCCCCCC (= O)OC                      |
| 43. | Spiro[3.5]nonan-1-one, 5-methyl-, trans-                                    | 557033   | C10H16O   | CC1CCCCC12CCC2 = O                            |
| 44. | n-Hexadecanoic acid                                                         | 985      | C16H32O2  | CCCCCCCCCCCCCCCC (= O)O                       |
| 45. | Phosphetane, 1-chloro-2,2,3,4,4-pentamethyl-                                | 549908   | C8H16PCl  | CC1C(P (= O)(C1(C)C)Cl)(C)C                   |
| 46. | Heptadecanoic acid                                                          | 10465    | C17H34O2  | CCCCCCCCCCCCCCCC (= O)O                       |

(Continued)



Table 1. (Continued)

| No  | Compound                                    | CID      | Formula  | SMILE                             |
|-----|---------------------------------------------|----------|----------|-----------------------------------|
| 47. | 7,10,13-Hexadecatrienoic acid, methyl ester | 5367325  | C17H28O2 | CCC = CCC = CCC = CCCCCC (= O)OC  |
| 48. | Phytol                                      | 5280435  | C20H40O  | CC(C)CCCC(C)CCCC(C)CCCC (= CCO)C  |
| 49. | 9,12-Octadecadienoic acid (Z,Z)-            | 3931     | C18H32O2 | CCCCC = CCC = CCCCCCCC (= O)O     |
| 50. | 9,12,15-Octadecatrienoic acid               | 860      | C18H30O2 | CCC = CCC = CCC = CCCCCCCC (= O)O |
| 51. | Octadecanoic acid                           | 8158     | C18H36O2 | CCCCCCCCC (= O)O                  |
| 52. | (1S,15S)-Bicyclo[13.1.0]hexadecan- 2-one    | 13760785 | C16H28O  | C1CCCCC (= O)C2CC2CCCC1           |

<https://doi.org/10.1371/journal.pone.0305348.t001>

phenyl- can work through a dual inhibitor mechanism because it has a more negative binding affinity on the two targets. Target inhibition by *Pandanus* sp. compounds triggers inhibition of replication, reproduction, virulence, and invasion of microbes. The 3D structures of candidate antimicrobial compounds are shown through transparent surfaces and sticks with a single-color selection (Fig 3).

**Ligand-protein interaction.** Analysis of molecular interactions in protein-ligand complexes aims to determine the position and type of chemical bonds formed. Weak chemical bonds such as van der Waals, electrostatic, hydrophobic, hydrogen and pi/alkyl bonds are produced by ligands. Weak bonds can trigger ligand activity on targets such as inhibitors. The number of unfavorable interactions on the protein-ligand complex must be <3 to be stable.

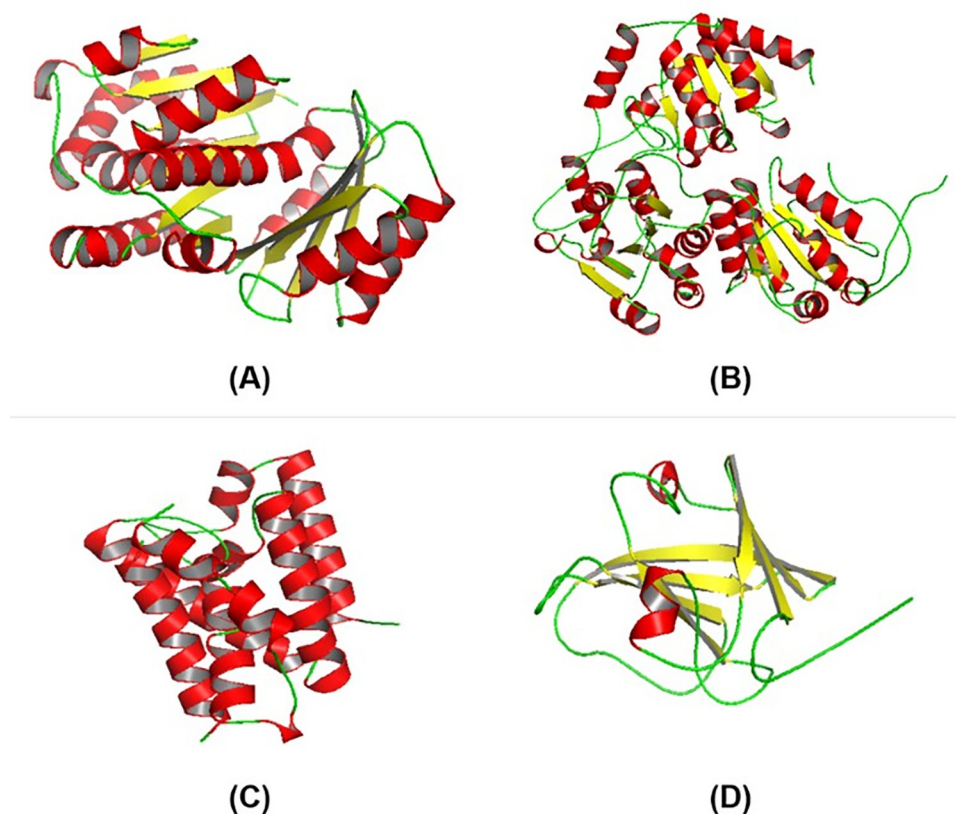

**Fig 2. Antimicrobial targets of microorganisms consisting of *Bacillus subtilis*, *Candida albicans*, *Escherichia coli*, and *Staphylococcus aureus*.** (A) FtsZ; (B) AHAS; (C) Rpro; (D) SA. Secondary protein structures such as the  $\alpha$ -helix (red),  $\beta$ -sheet (yellow), and coil (green).

<https://doi.org/10.1371/journal.pone.0305348.g002>

Table 2. The result of drug likeness analysis of *Pandanus amaryllifolius* Roxb. compounds.

| Compound                                                                   | CID      | Molecular Mass<br>(≤500 D) | LOGP<br>(≤5) | Hydrogen Bond  |                    | Molar Refractivity<br>(40–130) | Probable           |
|----------------------------------------------------------------------------|----------|----------------------------|--------------|----------------|--------------------|--------------------------------|--------------------|
|                                                                            |          |                            |              | Donors<br>(≤5) | Acceptors<br>(≤10) |                                |                    |
| 1,2,3-Propanetriol                                                         | 753      | 92.000                     | -1.668       | 3              | 3                  | 20.178                         | Drug like-molecule |
| 2(5H)-Furanone, 3-methyl-                                                  | 30945    | 98.000                     | 0.489        | 0              | 2                  | 24.715                         | Drug like-molecule |
| 1H-Azepin-1-amine, hexahydro-                                              | 22198    | 114.000                    | 0.736        | 2              | 2                  | 34.228                         | Drug like-molecule |
| Benzyl Alcohol                                                             | 244      | 108.000                    | 1.178        | 1              | 1                  | 32.364                         | Drug like-molecule |
| 3(2H)-Furanone, dihydro-5-isopropyl                                        | 546095   | 128.000                    | 1.000        | 0              | 2                  | 34.201                         | Drug like-molecule |
| Uracil, 1-N-methyl                                                         | 12009    | 126.000                    | -0.318       | 1              | 4                  | 30.441                         | Drug like-molecule |
| 1,3-Heptadiene, 2,3-dimethyl-                                              | 5370123  | 124.000                    | 3.308        | 0              | 0                  | 43.478                         | Drug like-molecule |
| 3-Ethyl-3-heptanol                                                         | 88241    | 144.000                    | 2.727        | 1              | 1                  | 45.056                         | Drug like-molecule |
| N-Met Ethanol, 2-amino-                                                    | 700      | 61.000                     | -1.062       | 3              | 2                  | 16.140                         | Drug like-molecule |
| 4H-Pyran-4-one, 2,3-dihydro-3,5-dihydroxy-6-methyl-                        | 119838   | 144.000                    | -0.263       | 2              | 4                  | 32.294                         | Drug like-molecule |
| -Pyrrolidinepropanol,.alpha.-cyclohexyl-.alpha.-phenyl-                    | 207839   | 287.000                    | 3.940        | 1              | 2                  | 87.204                         | Drug like-molecule |
| Furan, 2-ethoxy-2,3-dihydro-4-methyl-                                      | 551516   | 128.000                    | 1.673        | 0              | 2                  | 34.872                         | Drug like-molecule |
| Phenol, 2-ethoxy-                                                          | 66755    | 138.000                    | 1.790        | 1              | 2                  | 39.275                         | Drug like-molecule |
| Benzofuran, 2,3-dihydro-                                                   | 10329    | 120.000                    | 1.621        | 0              | 1                  | 35.640                         | Drug like-molecule |
| Benzonitrile                                                               | 7505     | 103.000                    | 1.558        | 0              | 1                  | 31.156                         | Drug like-molecule |
| (2,5-Dichlorophenyl)hydrazine                                              | 9366     | 177.000                    | 2.279        | 3              | 2                  | 44.272                         | Drug like-molecule |
| 2-(1-Methylideneethyl)cyclopentane-1-carboxaldehyde Dimethyl Acetal isomer | 15178998 | 140.000                    | 1.659        | 0              | 2                  | 38.566                         | Drug like-molecule |
| 2H-Pyran, tetrahydro-2-methoxy-                                            | 23057    | 116.000                    | 1.159        | 0              | 2                  | 30.599                         | Drug like-molecule |
| 2-Cyanobenzaldehyde                                                        | 101209   | 131.000                    | 1.370        | 0              | 2                  | 36.544                         | Drug like-molecule |
| Cyclohexanone, oxime                                                       | 7517     | 113.000                    | 1.679        | 1              | 2                  | 32.455                         | Drug like-molecule |
| 2(1H)-Pyrimidinethione, 4,5-diamino-                                       | 3036166  | 142.000                    | -0.056       | 5              | 3                  | 40.010                         | Drug like-molecule |
| 5-Nonanol, 5-methyl-                                                       | 141860   | 158.000                    | 3.117        | 1              | 1                  | 49.673                         | Drug like-molecule |
| 4-amino-1-.beta.-D-ribofuranosyl-2(1H)-pyrimidinone                        | 6175     | 243.000                    | -2.268       | 5              | 8                  | 55.757                         | Drug like-molecule |
| n-Decanoic acid                                                            | 2969     | 172.000                    | 3.211        | 1              | 2                  | 50.245                         | Drug like-molecule |
| Thieno(3,2-d)isothiazole                                                   | 14024710 | 157.000                    | 2.385        | 1              | 2                  | 39.194                         | Drug like-molecule |
| 4-Cyclopropylmethylbenzonitrile                                            | 55282712 | 172.000                    | 1.968        | 2              | 2                  | 50.809                         | Drug like-molecule |

(Continued)

Table 2. (Continued)

| Compound                                                   | CID      | Molecular Mass<br>(≤500 D) | LOGP<br>(≤5) | Hydrogen Bond  |                    | Molar Refractivity<br>(40–130) | Probable           |
|------------------------------------------------------------|----------|----------------------------|--------------|----------------|--------------------|--------------------------------|--------------------|
|                                                            |          |                            |              | Donors<br>(≤5) | Acceptors<br>(≤10) |                                |                    |
| 2(4H)-Benzofuranone, 5,6,7,7a-tetrahydro-4,4,7a-trimethyl- | 14334    | 196.000                    | 1.409        | 1              | 3                  | 51.601                         | Drug like-molecule |
| Dodecanoic acid                                            | 3893     | 200.000                    | 3.991        | 1              | 2                  | 59.479                         | Drug like-molecule |
| 2,6-Dimethyl-3-(methoxymethyl)-p-benzoquinone              | 6430513  | 180.000                    | 1.047        | 0              | 3                  | 48.346                         | Drug like-molecule |
| 1,7-Azuloquinone                                           | 9231     | 128.000                    | 2.455        | 0              | 0                  | 43.412                         | Drug like-molecule |
| Quinic acid                                                | 6508     | 192.000                    | -2.321       | 5              | 6                  | 39.839                         | Drug like-molecule |
| Patchoulialcohol                                           | 10955174 | 222.000                    | 3.609        | 1              | 1                  | 66.066                         | Drug like-molecule |
| Cyclohexanone, 3-(3-butenyl)-                              | 566226   | 152.000                    | 2.711        | 0              | 1                  | 46.395                         | Drug like-molecule |
| 4-((1E)-3-Hydroxy-1-propenyl)-2-methoxyphenol              | 91753526 | 180.000                    | 2.319        | 2              | 3                  | 50.938                         | Drug like-molecule |
| Tetradecanoic acid                                         | 11005    | 228.000                    | 4.772        | 1              | 2                  | 68.713                         | Drug like-molecule |
| (-)-Loliolide                                              | 100332   | 196.000                    | 1.409        | 1              | 3                  | 51.601                         | Drug like-molecule |
| i-Inositol                                                 | 892      | 180.000                    | -3.834       | 6              | 6                  | 36.040                         | Drug like-molecule |
| Neophytadiene                                              | 10446    | 278.000                    | 7.167        | 0              | 0                  | 94.055                         | Drug like-molecule |
| 2-Pentadecanone, 6,10,14-trimethyl                         | 10408    | 268.000                    | 6.014        | 0              | 1                  | 85.399                         | Drug like-molecule |
| Pentadecylic acid                                          | 13849    | 242.000                    | 5.162        | 1              | 2                  | 73.330                         | Drug like-molecule |
| 2-Hexadecen-1-ol, 3,7,11,15-tetramethyl-, [R-[R*,R*-(E)]]- | 5366244  | 296.000                    | 6.364        | 1              | 1                  | 95.561                         | Drug like-molecule |
| Hexadecanoic acid, methyl ester                            | 8181     | 270.000                    | 5.640        | 0              | 2                  | 82.327                         | Drug like-molecule |
| Spiro[3.5]nonan-1-one, 5-methyl-, trans-                   | 557033   | 152.000                    | 2.545        | 0              | 1                  | 44.305                         | Drug like-molecule |
| n-Hexadecanoic acid                                        | 985      | 256.000                    | 5.552        | 1              | 2                  | 77.947                         | Drug like-molecule |
| Phosphetane, 1-chloro-2,2,3,4,4-pentamethyl-               | 549908   | 194.500                    | 3.710        | 0              | 1                  | 50.781                         | Drug like-molecule |
| Heptadecanoic acid                                         | 10465    | 270.000                    | 5.942        | 1              | 2                  | 82.564                         | Drug like-molecule |
| 7,10,13-Hexadecatrienoic acid, methyl ester                | 5367325  | 264.000                    | 4.968        | 0              | 2                  | 82.045                         | Drug like-molecule |
| Phytol                                                     | 5280435  | 296.000                    | 6.364        | 1              | 1                  | 95.561                         | Drug like-molecule |
| 9,12-Octadecadienoic acid (Z,Z)-                           | 3931     | 280.000                    | 5.884        | 1              | 2                  | 86.993                         | Drug like-molecule |
| 9,12,15-Octadecatrienoic acid                              | 860      | 278.000                    | 5.660        | 1              | 2                  | 86.899                         | Drug like-molecule |
| Octadecanoic acid                                          | 8158     | 158.000                    | 2.821        | 1              | 2                  | 45.628                         | Drug like-molecule |
| (1S,15S)-Bicyclo[13.1.0]hexadecan- 2-one                   | 13760785 | 236.000                    | 4.886        | 0              | 1                  | 72.007                         | Drug like-molecule |

<https://doi.org/10.1371/journal.pone.0305348.t002>

Table 3. Binding affinity comparison of *Pandanus amaryllifolius* Roxb. compounds.

| Compound                                                                   | CID      | Binding Affinity |      |      |      |
|----------------------------------------------------------------------------|----------|------------------|------|------|------|
|                                                                            |          | (kcal/mol)       |      |      |      |
|                                                                            |          | FtsZ             | AHAS | Rpro | SA   |
| 1,2,3-Propanetriol                                                         | 753      | -4.3             | -3.9 | -4.1 | -3.7 |
| 2(5H)-Furanone, 3-methyl-                                                  | 30945    | -4.9             | -5.2 | -4.7 | -4.5 |
| 1H-Azepin-1-amine, hexahydro-                                              | 22198    | -5.2             | -5.1 | -4.9 | -4.3 |
| Benzyl Alcohol                                                             | 244      | -5.4             | -5.4 | -5.4 | -3.8 |
| 3(2H)-Furanone, dihydro-5-isopropyl                                        | 546095   | -5.2             | -5.6 | -5.6 | -4.6 |
| Uracil, 1-N-methyl                                                         | 12009    | -5.0             | -5.7 | -5.7 | -5.1 |
| 1,3-Heptadiene, 2,3-dimethyl-                                              | 5370123  | -5.1             | -5.0 | -5.7 | -4.5 |
| 3-Ethyl-3-heptanol                                                         | 88241    | -4.4             | -5.2 | -5.3 | -4.2 |
| N-Met Ethanol, 2-amino-                                                    | 700      | -3.3             | -3.4 | -3.0 | -3.0 |
| 4H-Pyran-4-one, 2,3-dihydro-3,5-dihydroxy-6-methyl-                        | 119838   | -5.4             | -5.5 | -5.7 | -4.8 |
| -Pyrrolidinepropanol,.alpha.-cyclohexyl-.alpha.-phenyl-                    | 207840   | -6.5             | -7.3 | -7.9 | -7.3 |
| Furan, 2-ethoxy-2,3-dihydro-4-methyl-                                      | 551516   | -4.7             | -6.6 | -5.2 | -4.6 |
| Phenol, 2-ethoxy-                                                          | 66755    | -5.3             | -5.7 | -5.7 | -4.7 |
| Benzofuran, 2,3-dihydro-                                                   | 10329    | -5.9             | -5.7 | -5.9 | -5.0 |
| Benzonitrile                                                               | 7505     | -5.4             | -5.6 | -5.5 | -4.8 |
| (2,5-Dichlorophenyl)hydrazine                                              | 9366     | -5.3             | -5.9 | -6.1 | -4.7 |
| 2-(1-Methylideneethyl)cyclopentane-1-carboxaldehyde Dimethyl Acetal isomer | 15178998 | -5.1             | -5.3 | -5.7 | -4.3 |
| 2H-Pyran, tetrahydro-2-methoxy-                                            | 23057    | -4.6             | -4.7 | -4.9 | -4.1 |
| 2-Cyanobenzaldehyde                                                        | 101209   | -5.5             | -6.2 | -6.0 | -5.1 |
| Cyclohexanone, oxime                                                       | 7517     | -6.0             | -5.7 | -5.5 | -5.1 |
| 2(1H)-Pyrimidinethione, 4,5-diamino-                                       | 3036166  | -5.2             | -4.8 | -4.9 | -4.5 |
| 5-Nonanol, 5-methyl-                                                       | 141860   | -4.9             | -5.0 | -5.6 | -4.5 |
| 4-amino-1-.beta.-D-ribofuranosyl-2(1H)-pyrimidinone                        | 6175     | -7.0             | -6.4 | -6.5 | -5.8 |
| n-Decanoic acid                                                            | 2969     | -4.5             | -4.5 | -5.3 | -4.7 |
| Thieno(3,2-d)isothiazole                                                   | 14024710 | -5.0             | -5.6 | -5.0 | -4.8 |
| 4-Cyclopropylmethylbenzonitrile                                            | 55282712 | -5.7             | -6.5 | -6.9 | -5.9 |
| 2(4H)-Benzofuranone, 5,6,7,7a-tetrahydro-4,4,7a-trimethyl-                 | 14334    | -6.0             | -6.8 | -7.1 | -5.8 |
| Dodecanoic acid                                                            | 3893     | -4.5             | -4.9 | -5.5 | -5.1 |
| 2,6-Dimethyl-3-(methoxymethyl)-p-benzoquinone                              | 6430513  | -6.1             | -6.0 | -6.5 | -4.9 |
| 1,7-Azuloquinone                                                           | 9231     | -6.5             | -6.5 | -6.9 | -5.8 |
| Quinic acid                                                                | 6508     | -5.8             | -6.2 | -5.7 | -5.6 |
| Patchoulialcohol                                                           | 10955174 | -5.9             | -6.6 | -6.7 | -6.8 |
| Cyclohexanone, 3-(3-butenyl)-                                              | 566226   | -5.0             | -6.0 | -6.1 | -5.1 |
| 4-((1E)-3-Hydroxy-1-propenyl)-2-methoxyphenol                              | 91753526 | -5.8             | -6.4 | -6.4 | -5.4 |
| Tetradecanoic acid                                                         | 11005    | -4.8             | -5.8 | -5.3 | -4.7 |
| (-)-Loliolide                                                              | 100332   | -6.2             | -6.8 | -7.1 | -5.9 |
| i-Inositol                                                                 | 892      | -6.0             | -5.6 | -6.1 | -5.1 |
| Neophytadiene                                                              | 10446    | -5.2             | -5.1 | -6.2 | -5.2 |
| 2-Pentadecanone, 6,10,14-trimethyl                                         | 10408    | -4.8             | -4.6 | -6.3 | -5.5 |
| Pentadecylic acid                                                          | 13849    | -4.4             | -4.7 | -5.4 | -5.0 |
| 2-Hexadecen-1-ol, 3,7,11,15-tetramethyl-, [R-[R*,R*-(E)]]-                 | 5366244  | -5.3             | -5.0 | -6.1 | -5.5 |
| Hexadecanoic acid, methyl ester                                            | 8181     | -5.0             | -4.7 | -5.3 | -4.9 |
| Spiro[3.5]nonan-1-one, 5-methyl-, trans-                                   | 557033   | -4.9             | -5.9 | -6.4 | -5.3 |
| n-Hexadecanoic acid                                                        | 985      | -4.4             | -4.8 | -5.5 | -4.9 |
| Phosphetane, 1-chloro-2,2,3,4,4-pentamethyl-                               | 549908   | -4.6             | -4.9 | -5.1 | -4.8 |

(Continued)

Table 3. (Continued)

| Compound                                    | CID      | Binding Affinity |      |             |      |
|---------------------------------------------|----------|------------------|------|-------------|------|
|                                             |          | (kcal/mol)       |      |             |      |
|                                             |          | FtsZ             | AHAS | Rpro        | SA   |
| Heptadecanoic acid                          | 10465    | -4.5             | -4.4 | -5.4        | -4.9 |
| 7,10,13-Hexadecatrienoic acid, methyl ester | 5367325  | -5.4             | -5.5 | -5.9        | -5.0 |
| Phytol                                      | 5280435  | -5.1             | -5.1 | -5.5        | -5.4 |
| 9,12-Octadecadienoic acid (Z,Z)-            | 3931     | -5.1             | -4.6 | -5.7        | -5.4 |
| 9,12,15-Octadecatrienoic acid               | 860      | -5.7             | -5.0 | -5.6        | -5.2 |
| Octadecanoic acid                           | 8158     | -4.9             | -5.4 | -5.4        | -5.7 |
| (1S,15S)-Bicyclo[13.1.0]hexadecan-2-one     | 13760785 | -6.3             | -6.8 | <b>-8.1</b> | -6.6 |

<https://doi.org/10.1371/journal.pone.0305348.t003>

The results of this study indicate that all ligands can form weak bond interactions (Table 4) such as van der Waals, hydrogen, and Pi/alkyl in the target domain. An unfavorable interaction was formed between 4-amino-1-.beta.-D-ribofuranosyl-2(1H)-pyrimidinone with the FtsZ domain of *Bacillus subtilis*, but does not affect the molecular complex stability (Fig 4). Compounds from *P. amaryllifolius* Roxb. consisting of 4-amino-1-.beta.-D-ribofuranosyl-2(1H)-pyrimidinone, Pyrrolidinepropanol, .alpha.-cyclohexyl-.alpha.-phenyl, and (1S,15S)-Bicyclo[13.1.0] hexadecan-2-one can act as an antimicrobial agent by inhibiting the activity of targets such as FtsZ, AHAS, Rpro, and SA.

**Antioxidant activity.** DPPH and ABTS assays were carried out to assess the antioxidant activities of the ethanol extract. The IC<sub>50</sub> values of the extract in comparison with ascorbic acid were presented in Table 5 (S1 Fig). The ethanol extract of *P. amaryllifolius* Roxb. possessed high antioxidant activity based on Prieto's criteria that IC<sub>50</sub> < 50 µg/ml [45], with IC<sub>50</sub> value 11.96 ± 4.01 µg/ml and 26.18 ± 7.44 µg/ml for DPPH and ABTS assays, respectively. The IC<sub>50</sub> value of antioxidant activity is a little bit more than ascorbic acid as a positive control. Suwanakul et al. [46] reported DPPH value of IC<sub>50</sub> of 110.57 ± 36.42 µg/ml for ethanol extract of *Pandanus* sp. Leaves, while Quyen et al. [47] reported IC<sub>50</sub> 129.327 and 104.31 µg/ml for DPPH and ABTS respectively compared to IC<sub>50</sub> of 11.96 ± 4.01 µg/ml and 26.18 ± 7.44 µg/ml for DPPH and ABTS obtained from this current study. The observed variations in antioxidants properties are likely due to location of the plant used for these studies.

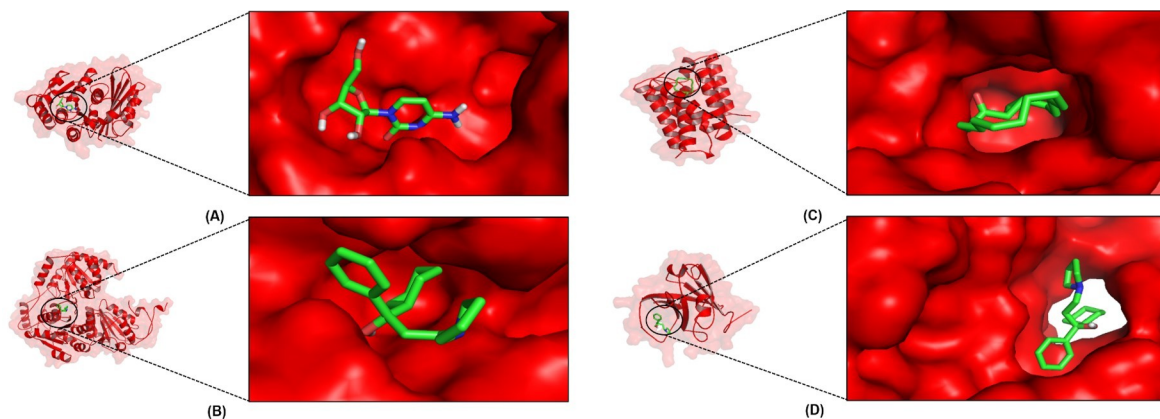

**Fig 3. Molecular visualization of the protein-ligand complex.** (A) FtsZ\_4-amino-1-.beta.-D-ribofuranosyl-2(1H)-pyrimidinone; (B) AHAS\_Pyrrolidinepropanol,.alpha.-cyclohexyl-.alpha.-phenyl; (C) Rpro\_(1S,15S)-Bicyclo[13.1.0]hexadecan-2-one; (D) SA\_Pyrrolidinepropanol,.alpha.-cyclohexyl-.alpha.-phenyl.

<https://doi.org/10.1371/journal.pone.0305348.g003>



Table 4. Molecular interaction of protein-ligand based on the binding affinity result.

| Microorganism                | Protein | Ligand                                                 | Chemical Interaction                                                                                        |
|------------------------------|---------|--------------------------------------------------------|-------------------------------------------------------------------------------------------------------------|
| <i>Bacillus subtilis</i>     | FtsZ    | 4-amino-1-.beta.-D-ribofuranosyl-2(1H)-pyrimidinone    | Unfavorable: UNKN:1                                                                                         |
|                              |         |                                                        | van der Waals: Gly20, Gly22                                                                                 |
|                              |         |                                                        | Hydrogen: Asn44, Thr109, Gly108, Gly110                                                                     |
|                              |         |                                                        | Pi: Arg143                                                                                                  |
| <i>Candida albicans</i>      | AHAS    | Pyrrolidinepropanol,.alpha.-cyclohexyl-.alpha.-phenyl- | van der Waals: Ser477, Phe504, Ala480, Thr505, Thr511, Glu486, Thr507, Gln508, Lys485, Arg340               |
|                              |         |                                                        | Pi/Alkyl: Gln481, Val487, Trp506                                                                            |
| <i>Escherichia coli</i>      | Rpro    | (1S,15S)-Bicyclo[13.1.0]hexadecan- 2-one               | van der Waals: His254, Gly240, Ser201, Tyr205, Val204, Asn154, Trp157, Phe153, Met149, His150               |
|                              |         |                                                        | Pi/Alkyl: Trp236                                                                                            |
| <i>Staphylococcus aureus</i> | SA      | Pyrrolidinepropanol,.alpha.-cyclohexyl-.alpha.-phenyl- | van der Waals: Ser58, Lys117, Val143, Gln120, Asn56, Thr122, Glu113, Asp112, Val110, Val103, Arg139, Val108 |
|                              |         |                                                        | Pi/Alkyl: Ile141, Ile124, Leu111                                                                            |

<https://doi.org/10.1371/journal.pone.0305348.t004>

Moreover, compared to the other studies, the leaf extract from *P. amaryllifolius* Roxb. was lower than *Pterocarpus macrocarpus* Kurz. bark extract [3], *Trifolium pratense* L. [48], *Callisia fragrance* leaf juice [45], and *Centella asiatica* L. leaf [49] that have been previously reported as high antioxidant compound. In addition, the antioxidant activity of this study was higher than *Sonchus arvensis* L. [2, 15]. The potent antioxidant activity of the *P. amaryllifolius* Roxb. extract was probably due to the presence of active ingredients with antioxidant activities.

**Antimicrobial activity.** *Staphylococcus aureus* and *Escherichia coli* collected in Surabaya were mainly used in this study as representatives of pathogenic bacteria and yeast as representatives of fungi for the analysis of antimicrobial activity. Antimicrobial tests were carried out with all the extracts against bacteria (Table 6, Fig 5), the ethanol extract has antimicrobial activities against all the pathogens. The diameter of inhibition zone (DIZ) and percentage of inhibition were varied for every single pathogen,  $13.88 \pm 0.48$  mm/ $56.19 \pm 2.62\%$  (25%);  $16.44 \pm 1.21$  mm/ $66.76 \pm 4.92$  (50%), and  $15.49 \pm 1.00$  mm/ $60.05 \pm 1.45\%$  (25%);  $21.22 \pm 0.11$  mm/ $82.49 \pm 3.91\%$  (50%) for *S. aureus* and *E. coli* respectively. The results from the antimicrobial analysis formed the basis on which subsequent studies were carried out with the use of only ethanol extract.

Gonelimali et al. (2018) studied antimicrobial property of ethanolic extracts of *Hibiscus sabdariffa* (roselle), *Syzygium aromaticum* (clove), *Rosmarinus officinalis* (rosemary) and *Thymus vulgaris* (thyme) against several food pathogens and food spoiling bacteria. They found zone of inhibition (in mm)  $21.1 \pm 1.3$  (roselle),  $17.4 \pm 0.8$  (rosemary),  $21.1 \pm 0.9$  (clove),  $15.9 \pm 0.3$  (thyme) for *E. coli* bacteria. However,  $21.5 \pm 2.1$  (roselle),  $16.7 \pm 1.0$  (rosemary),  $19.8 \pm 0.4$  (clove),  $16.3 \pm 1$  (thyme) for *S. aureus* [50]. Razmavar et al. (2014) observed antimicrobial activity of ethanolic extracts of *Baeckea frutescens* leaves against *E. coli* and *S. aureus* bacteria. They observed inhibition zone (in mm) are of 7 for 20% and 7.5 for 50% against *E. coli* and that of 7.5 for 20% and 11.5 for 50% for *S. aureus* respectively [51]. Based on these values we can say that our results are in line with previous literature. Hence, *P. amaryllifolius* Roxb. possesses potential of antimicrobial activity.

Microbial infection will increase free radicals (reactive oxygen intermediates/ROI, reactive oxygen species/ROS, and nitric oxide synthetize/NO). Free radicals are molecules with one unpaired electron in their outer orbit which makes the molecule unstable [52]. Free radicals can cause oxidative stress. It has implications for various pathological conditions [53]. The involvement of oxidative stress can cause the amount of antioxidant status to decrease [52]. Oxidative stress condition is defined as an imbalance condition between antioxidants and free

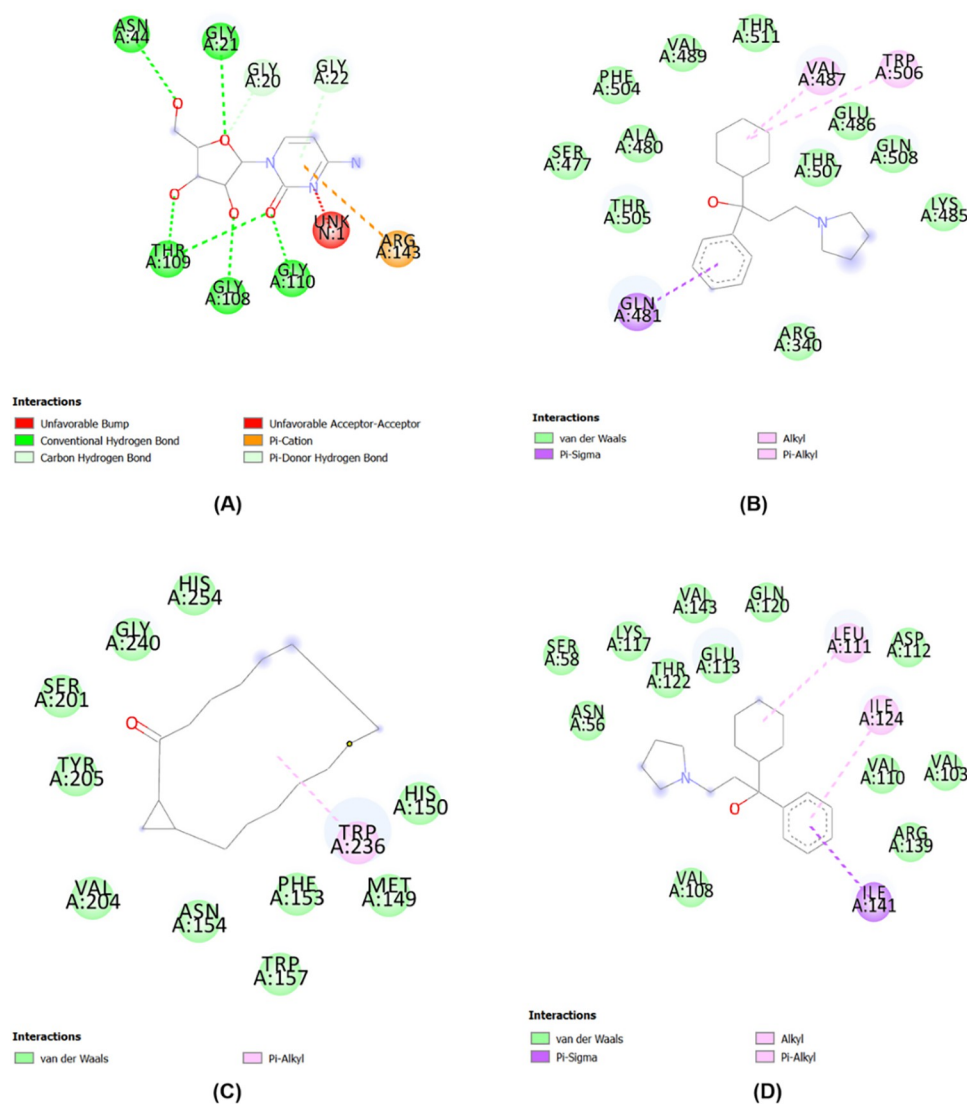

**Fig 4. Types of interactions and chemical bond positions.** (A) FtsZ\_4-amino-1-.beta.-D-ribofuranosyl-2(1H)-pyrimidinone; (B) AHAS\_Pyrrolidinepropanol,.alpha.-cyclohexyl-.alpha.-phenyl-; (C) Rpro\_(1S,15S)- Bicyclo[13.1.0]hexadecan-2-one; (D) SA\_Pyrrolidinepropanol,.alpha.-cyclohexyl-.alpha.-phenyl.

<https://doi.org/10.1371/journal.pone.0305348.g004>

**Table 5. *In vitro* antioxidant activity of *Pandanus amaryllifolius* Roxb. leaves ethanol extract.**

| Sample                         | Antioxidant activity, IC <sub>50</sub> (μg/ml) |              |
|--------------------------------|------------------------------------------------|--------------|
|                                | DPPH                                           | ABTS         |
| <i>P. amaryllifolius</i> Roxb. | 11.96 ± 4.01                                   | 26.18 ± 7.44 |
| Ascorbic acid                  | 11.42 ± 0.32                                   | 12.77 ± 1.30 |

Note: The data were represented as mean ± SD, n = 3

<https://doi.org/10.1371/journal.pone.0305348.t005>

Table 6. Diameter of inhibition zone and percentage of inhibition of *Pandanus amaryllifolius* Roxb. leaves extracts.

| Natural Products               | <i>Staphylococcus aureus</i> |              |              |              | <i>Escherichia coli</i> |              |              |              |
|--------------------------------|------------------------------|--------------|--------------|--------------|-------------------------|--------------|--------------|--------------|
|                                | 25%                          |              | 50%          |              | 25%                     |              | 50%          |              |
|                                | DIZ (mm)                     | PI (%)       | DIZ (mm)     | PI (%)       | DIZ (mm)                | PI (%)       | DIZ (mm)     | PI (%)       |
| <i>P. amaryllifolius</i> Roxb. | 13.88 ± 0.48                 | 56.19 ± 2.62 | 16.44 ± 1.21 | 66.76 ± 4.92 | 15.49 ± 1.00            | 60.05 ± 1.45 | 21.22 ± 0.11 | 82.49 ± 3.91 |
| Chloramphenicol                | 25.62 ± 0.28                 |              |              |              | 24.63 ± 0.80            |              |              |              |

Note: The data are represented as mean ± SD, n = 3. DIZ: diameter of inhibition zone (mm); PI: percentage of inhibition (%); positive control: Chloramphenicol and Nystatin.

<https://doi.org/10.1371/journal.pone.0305348.t006>

radicals, where the state of free radicals is higher than antioxidants [52]. The number of antioxidants decreases because the body used to balance the high free radicals due to the presence of parasites. The more severe the infection from microbe, the use of antioxidants in the body will increase, causing the number of antioxidants in the body to decrease [52]. It is very valuable for the further investigation of efficacious the *P. amaryllifolius* Roxb. leaf as antimicrobial agent candidate.

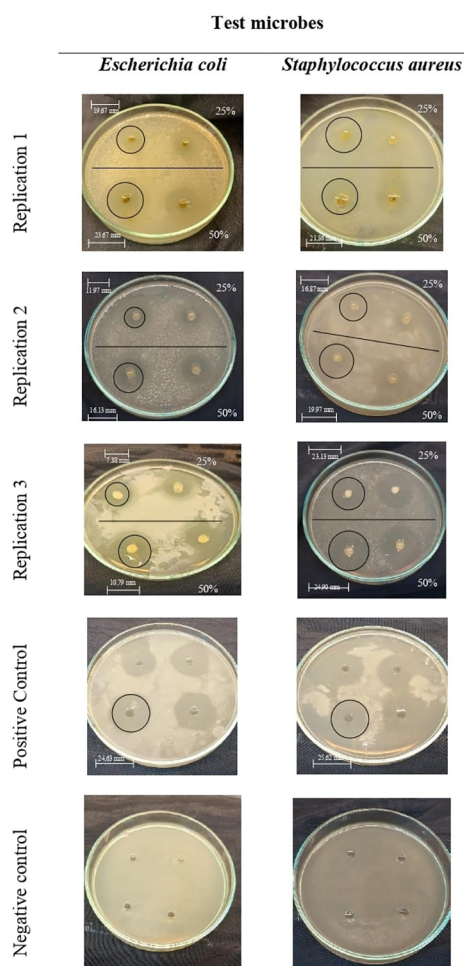

Fig 5. Antimicrobial activity evaluated using agar well diffusion method against *Escherichia coli* and *Staphylococcus aureus*.

<https://doi.org/10.1371/journal.pone.0305348.g005>

The *in silico* molecular docking studies supported the experimental findings and provided insight into the mechanism of action of the bioactive compounds. The results showed that the compounds in *P. amaryllifolius* Roxb. extract can effectively bind to the target proteins of the selected pathogens, inhibiting their growth and replication. The *in silico* studies revealed that the extract can serve as an antimicrobial against *Bacillus subtilis*, *Candida albicans*, *Escherichia coli*, and *Staphylococcus aureus* by inhibiting the activity of FtsZ, AHAS, Rpro, and SA via 4-amino-1- $\beta$ -D-ribofuranosyl-2(1H)-pyrimidinone, -Pyrrolidinepropanol,  $\alpha$ -cyclohexyl- $\alpha$ -phenyl, and (1S,15S)-Bicyclo[13.1.0]hexadecan-2-one with more negative binding affinity and form stable interactions. The results of this study also revealed that -Pyrrolidinepropanol,  $\alpha$ -cyclohexyl- $\alpha$ -phenyl has dual inhibitory activity on AHAS and SA. Overall, this study provides compelling evidence that *P. amaryllifolius* Roxb. leaves is a promising candidate for the expansion of new antimicrobial agents.

## Conclusion

This study presents a wide-ranging exploration of the antimicrobial potential of *Pandanus amaryllifolius* Roxb. phytochemical screening uncovered the existence of several bioactive compounds in the plant extract, which may contribute to its antimicrobial activity. Additionally, antioxidant assays demonstrated the plant's potential to scavenge free radicals, which may further enhance its therapeutic properties. These findings are a significant step forward in the search for novel and effective alternatives to conventional antimicrobial agents.

## Supporting information

**S1 Fig. Figure of regression linear for DPPH and ABTS result of *Pandanus amaryllifolius* Roxb. leaves extract.** Rep: replication.

(DOCX)

**S1 Table. Preliminary phytochemical screening of *Pandanus amaryllifolius* Roxb. leaves ethanol extracts.**

(DOCX)

**S2 Table. GC-MS spectral analysis of ethanol extract of *Pandanus amaryllifolius* Roxb.**

(DOCX)

**S3 Table. Antimicrobial result of *Pandanus amaryllifolius* Roxb. leaves extracts.**

(DOCX)

## Author Contributions

**Conceptualization:** Dwi Kusuma Wahyuni, Sumrit Wacharasindu, Sehanat Prasongsuk, Hery Purnobasuki.

**Data curation:** Dwi Kusuma Wahyuni, Gita Aqila Nuha, Tope Gafar Atere, Viol Dhea Kharisma, Vinaya Satyawati, Cici Tya Rahmawati, Ahmad Affan Ali Murtadlo, Alvi Jauharotus Syukriya.

**Formal analysis:** Gita Aqila Nuha, Tope Gafar Atere, Viol Dhea Kharisma, Vinaya Satyawati, Cici Tya Rahmawati, Ahmad Affan Ali Murtadlo, Alvi Jauharotus Syukriya.

**Investigation:** Dwi Kusuma Wahyuni, Gita Aqila Nuha, Tope Gafar Atere, Viol Dhea Kharisma, Vinaya Satyawati, Cici Tya Rahmawati, Ahmad Affan Ali Murtadlo, Alvi Jauharotus Syukriya.

**Methodology:** Dwi Kusuma Wahyuni, Gita Aqila Nuha, Tope Gafar Atere, Viol Dhea Kharisma, Vinaya Satyawati, Cici Tya Rahmawati, Ahmad Affan Ali Murtadlo, Alvi Jauharotus Syukriya.

**Writing – original draft:** Dwi Kusuma Wahyuni, Gita Aqila Nuha, Tope Gafar Atere, Viol Dhea Kharisma, Vinaya Satyawati, Cici Tya Rahmawati, Ahmad Affan Ali Murtadlo, Alvi Jauharotus Syukriya.

**Writing – review & editing:** Dwi Kusuma Wahyuni, Sumrit Wacharasindu, Sehanat Prasongsuk, Hery Purnobasuki.

## References

1. Chauhan J, Chakraverty R, Pathan S. Antimicrobial stewardship program activities in India: an appraisal. *International Journal of Basic & Clinical Pharmacology*. 2022; 11(6):676. <https://doi.org/10.18203/2319-2003.ijbcp20222756>
2. Wahyuni DK, Nariswari A, Supriyanto A, Purnobasuki H, Punnapayak H, Bankeeree W, et al. Antioxidant, antimicrobial, and antiparasmodial activities of *Sonchus arvensis* L. leaf ethyl acetate fractions. *Pharmacognosy Journal*. 2023; 14(6):993–8. <https://doi.org/10.5530/pj.2022.14.202>
3. Wahyuni DK, Wacharasindhu S, Bankeeree W, Punnapayak H, Prasongsuk S. In silico anti-SARS-CoV-2, antiparasmodial, antioxidant, and antimicrobial activities of crude extracts and homopterocarpin from heartwood of *Pterocarpus macrocarpus* Kurz. *Heliyon*. 2023; 9(2). <https://doi.org/10.1016/j.heliyon.2023.e13644> PMID: 36789389
4. Hu X-Y, Logue M, Robinson N. Antimicrobial resistance is a global problem—a UK perspective. *European Journal of Integrative Medicine*. 2020; 36:101136. <https://doi.org/10.1016/j.eujim.2020.101136> PMID: 32399092
5. Tortorella E, Tedesco P, Palma Esposito F, January GG, Fani R, Jaspars M, et al. Antibiotics from deep-sea microorganisms: current discoveries and perspectives. *Marine Drugs*. 2018; 16(10):355. <https://doi.org/10.3390/md16100355> PMID: 30274274
6. Vaou N, Stavropoulou E, Voidarou C, Tsigalou C, Bezirtzoglou E. Towards advances in medicinal plant antimicrobial activity: A review study on challenges and future perspectives. *Microorganisms*. 2021; 9(10):2041. <https://doi.org/10.3390/microorganisms9102041> PMID: 34683362
7. O'Neill J. Tackling drug-resistant infections globally: final report and recommendations. 2016.
8. Hossain S, Urbi Z, Karuniawati H, Mohiuddin RB, Moh Qrimida A, Allzag AMM, et al. *Andrographis paniculata* (Burm. F.) wall. Ex nees: an updated review of phytochemistry, antimicrobial pharmacology, and clinical safety and efficacy. *Life*. 2021; 11(4):348. <https://doi.org/10.3390/life11040348> PMID: 33923529
9. Anand U, Jacobo-Herrera N, Altemimi A, Lakhssassi N. A comprehensive review on medicinal plants as antimicrobial therapeutics: potential avenues of biocompatible drug discovery. *Metabolites*. 2019; 9(11):258. <https://doi.org/10.3390/metabo9110258> PMID: 31683833
10. Tari V, Patil P. Transfer of heavy metal in soil to plant from pesticide contaminated area (mango orchards) of ratnagiri district, Maharashtra, India. *Research Journal Chemistry and Environment*. 2017; 21:26–32.
11. Wahyuni DK, Lestari S, Kuncoro EP, Purnobasuki H. Callus induction and its metabolite profiles of *Sonchus arvensis* L. under temperature treatment. *Annals of Biology*. 2020; 36(2):299–303.
12. Kebede T, Gadisa E, Tufa A. Antimicrobial activities evaluation and phytochemical screening of some selected medicinal plants: A possible alternative in the treatment of multidrug-resistant microbes. *PLoS One*. 2021; 16(3):e0249253. <https://doi.org/10.1371/journal.pone.0249253> PMID: 33770121
13. Ilham M, Mukarromah SR, Rakashiwi GA, Indriati DT, Yoku BF, Purnama PR, et al. Morpho-anatomical characterization and DNA barcoding of *Achillea millefolium* L. *Biodiversitas Journal of Biological Diversity*. 2022; 23(4). <https://doi.org/10.13057/biodiv/d230430>
14. Purnobasuki H, Rakashiwi GA, Junairiah J, Wahyuni DK, Putra RE, Raffiudin R, et al. Morpho-anatomical characterization and DNA barcode of *Cosmos caudatus* Kunth. *Biodiversitas Journal of Biological Diversity*. 2022; 23(8). <https://doi.org/10.13057/biodiv/d230830>
15. Wahyuni DK, Wacharasindhu S, Bankeeree W, Wahyuningsih SPA, Ekasari W, Purnobasuki H, et al. *In vitro* and *in vivo* antiparasmodial activities of leaf extracts from *Sonchus arvensis* L. *BMC Complementary Medicine and Therapies*. 2023; 23(1):1–12. <https://doi.org/10.1186/s12906-023-03871-7> PMID: 36788545



16. Bhuyan B, Sonowal R. An Overview of *Pandanus amaryllifolius* Roxb. Ex Lindl. and Its Potential Impact On Health. *Current Trends in Pharmaceutical Research*. 2021; 8(1):138–57.
17. Putri MS, Girsang E, Chiuman L, Ginting CN. Effectiveness Of Incision Wound Healing Of *Pandanus amaryllifolius* Roxb In Wistar Rats. *International Journal of Health and Pharmaceutical (IJHP)*. 2022; 2(2):240–9. <https://doi.org/10.51601/ijhp.v2i2.33>
18. Keim AP, Sujarwo W. *Pandanus amaryllifolius* Roxb. ex Lindl. Pandanaceae. *Ethnobotany of the Mountain Regions of Southeast Asia*: Springer; 2021. p. 783–9.
19. Pande G, Akoh CC. Organic acids, antioxidant capacity, phenolic content and lipid characterisation of Georgia-grown underutilized fruit crops. *Food Chemistry*. 2010; 120(4):1067–75.
20. Kim S, Thiessen PA, Bolton EE, Chen J, Fu G, Gindulyte A, et al. PubChem substance and compound databases. *Nucleic Acids Research*. 2016; 44(D1):D1202–D13. <https://doi.org/10.1093/nar/gkv951> PMID: 26400175
21. Prahasanti C, Nugraha AP, Kharisma VD, Ansori ANM, Devijanti R, Ridwan T, et al. A bioinformatic approach of hydroxyapatite and polymethylmethacrylate composite exploration as dental implant bio-material. *Journal of Pharmacy and Pharmacognosy Resesearch*. 2021; 9(5):746–54. [https://doi.org/10.56499/jppres21.1078\\_9.5.746](https://doi.org/10.56499/jppres21.1078_9.5.746)
22. Rigsby RE, Parker AB. Using the Py MOL application to reinforce visual understanding of protein structure. *Biochemistry and Molecular Biology Education*. 2016; 44(5):433–7. <https://doi.org/10.1002/bmb.20966> PMID: 27241834
23. Dibha A, Wahyuningsih S, Ansori A, Kharisma V, Widyananda M, Parikesit A, et al. Utilization of secondary metabolites in algae *Kappaphycus alvarezii* as a breast cancer drug with a computational method. *Pharmacognosy Journal*. 2022; 14(3). <https://doi.org/10.5530/pj.2022.14.68>
24. Karami TK, Hailu S, Feng S, Graham R, Gukasyan HJ. Eyes on Lipinski's Rule of Five: A New "Rule of Thumb" for physicochemical design space of ophthalmic drugs. *Journal of Ocular Pharmacology and Therapeutics*. 2022; 38(1):43–55. <https://doi.org/10.1089/jop.2021.0069> PMID: 34905402
25. Padmi H, Kharisma DV, Ansori ANM, Sibero MT, Widyananda MH, Ullah ME, et al. Macroalgae bioactive compounds for the potential antiviral of SARS-Cov-2: an in silico study. *Journal of Pure and Applied Microbiology*. 2022; 16(2):1018–27. <https://doi.org/10.22207/JPAM.16.2.26>
26. Rauf A, Rashid U, Khalil AA, Khan SA, Anwar S, Alafnan A, et al. Docking-based virtual screening and identification of potential COVID-19 main protease inhibitors from brown algae. *South African Journal of Botany*. 2021; 143:428–34. <https://doi.org/10.1016/j.sajb.2021.06.033> PMID: 34226782
27. Alazmi M, Motwalli O. *In silico* virtual screening, characterization, docking and molecular dynamics studies of crucial SARS-CoV-2 proteins. *Journal of Biomolecular Structure and Dynamics*. 2021; 39(17):6761–71. <https://doi.org/10.1080/07391102.2020.1803965> PMID: 32762537
28. Listiyani P, Kharisma VD, Ansori ANM, Widyananda MH, Probojati RT, Murtadlo AAA, et al. In silico phytochemical compounds screening of *Allium sativum* targeting the Mpro of SARS-CoV-2. *Pharmacognosy Journal*. 2022; 14(3). <https://doi.org/10.5530/pj.2022.14.78>
29. Nugraha AP, Rahmadhani D, Puspitaningrum MS, Rizqianti Y, Kharisma VD, Ernawati DS. Molecular docking of anthocyanins and ternatin in *Clitoria ternatea* as coronavirus disease oral manifestation therapy. *Journal of Advanced Pharmaceutical Technology & Research*. 2021; 12(4):362. [https://doi.org/10.4103/japtr.japtr\\_126\\_21](https://doi.org/10.4103/japtr.japtr_126_21) PMID: 34820310
30. Prieto JM. Procedure: Preparation of DPPH Radical, and antioxidant scavenging assay. *DPPH Microplate Protocol*. 2012:7–9.
31. Fu YP, Zou YF, Lei FY, Wangenstein H, Inngjerdingen KT. *Aconitum carmichaelii* Debeaux: A systematic review on traditional use, and the chemical structures and pharmacological properties of polysaccharides and phenolic compounds in the roots. *Journal of Ethnopharmacology*. 2022; 291:115148. Epub 2022/03/04. <https://doi.org/10.1016/j.jep.2022.115148> PMID: 35240238.
32. Zhang Y, Li M, Gao H, Wang B, Tongcheng X, Gao B, et al. Triacylglycerol, fatty acid, and phytochemical profiles in a new red sorghum variety (Ji Liang No. 1) and its antioxidant and anti-inflammatory properties. *Food Science & Nutrition*. 2019; 7(3):949–58. <https://doi.org/10.1002/fsn3.886> PMID: 30918637
33. Rajput A, Sharma R, Bharti R. Pharmacological activities and toxicities of alkaloids on human health. *Materials Today: Proceedings*. 2022; 48:1407–15. <https://doi.org/10.1016/j.matpr.2021.09.189>
34. Góral I, Wojciechowski K. Surface activity and foaming properties of saponin-rich plants extracts. *Advances in Colloid and Interface Science*. 2020; 279:102145. <https://doi.org/10.1016/j.cis.2020.102145> PMID: 32229329
35. Laddomada F, Miyachiro MM, Dessen A. Structural insights into protein-protein interactions involved in bacterial cell wall biogenesis. *Antibiotics*. 2016; 5(2):14. <https://doi.org/10.3390/antibiotics5020014> PMID: 27136593

36. Garcia MD, Chua SM, Low Y-S, Lee Y-T, Agnew-Francis K, Wang J-G, et al. Commercial AHAS-inhibiting herbicides are promising drug leads for the treatment of human fungal pathogenic infections. *Proceedings of the National Academy of Sciences*. 2018; 115(41):E9649–E58. <https://doi.org/10.1073/pnas.1809422115> PMID: 30249642
37. Aljohny BO, Rauf A, Anwar Y, Naz S, Wadood A. Antibacterial, antifungal, antioxidant, and docking studies of potential dinaphthodiospyrrols from *Diospyros lotus* Linn roots. *ACS omega*. 2021; 6(8):5878–85. <https://doi.org/10.1021/acsomega.0c06297> PMID: 33681626
38. Agarwal P, Huckle J, Newman J, Reid DL. Trends in small molecule drug properties: A developability molecule assessment perspective. *Drug Discovery Today*. 2022; 103366. <https://doi.org/10.1016/j.drudis.2022.103366> PMID: 36122862
39. Leeson PD, Bento AP, Gaulton A, Hersey A, Manners EJ, Radoux CJ, et al. Target-based evaluation of “drug-like” properties and ligand efficiencies. *Journal of Medicinal Chemistry*. 2021; 64(11):7210–30. <https://doi.org/10.1021/acs.jmedchem.1c00416> PMID: 33983732
40. Pinzi L, Rastelli G. Molecular docking: shifting paradigms in drug discovery. *International Journal of Molecular Sciences*. 2019; 20(18):4331. <https://doi.org/10.3390/ijms20184331> PMID: 31487867
41. Gupta A, Sahu N, Singh AP, Singh VK, Singh SC, Upadhye VJ, et al. Exploration of novel lichen compounds as inhibitors of SARS-CoV-2 Mpro: ligand-based design, molecular dynamics, and ADMET analyses. *Applied Biochemistry and Biotechnology*. 2022; 194(12):6386–406. <https://doi.org/10.1007/s12010-022-04103-3> PMID: 35921031
42. Opo FADM, Rahman MM, Ahammad F, Ahmed I, Bhuiyan MA, Asiri AM. Structure based pharmacophore modeling, virtual screening, molecular docking and ADMET approaches for identification of natural anti-cancer agents targeting XIAP protein. *Scientific Reports*. 2021; 11(1):4049. <https://doi.org/10.1038/s41598-021-83626-x> PMID: 33603068
43. Passarini I, Resende PE, Soares S, Tahmasi T, Stapleton P, Malkinson J, et al. Synthesis and in silico modelling of the potential dual mechanistic activity of small cationic peptides potentiating the antibiotic novobiocin against susceptible and multi-drug resistant *Escherichia coli*. *International Journal of Molecular Sciences*. 2020; 21(23):9134. <https://doi.org/10.3390/ijms21239134> PMID: 33266278
44. Alhadrami HA, Abdulaal WH, Hassan HM, Alhakamy NA, Sayed AM. *In silico*-based discovery of natural anthraquinones with potential against multidrug-resistant *E. coli*. *Pharmaceuticals*. 2022; 15(1):86. <https://doi.org/10.3390/ph15010086> PMID: 35056143
45. Olennikov D, Zilfikarov I, Toropova A, Ibragimov T. Chemical composition of *Callisia fragrans* wood juice and its antioxidative activity (*in vitro*). *Chemistry Plant Raw Material*. 2008; 4:95–100.
46. Suwannakul S, Chaibenjawong P, Suwannakul S. Antioxidant, anticancer and antimicrobial activities of ethanol *Pandanus amaryllifolius* Roxb. leaf extract (*in vitro*)—a potential medical application. *Journal of International Dental Medical Research* 2018; 11(2): pp. 383–389
47. Quyen N, Quyen N, Nhan L, Toan T, editors. Antioxidant activity, total phenolics and flavonoids contents of *Pandanus amaryllifolius* (Roxb.). *IOP Conference Series: Materials Science and Engineering*; 2020: IOP Publishing.
48. Khorasani Esmaeili A, Mat Taha R, Mohajer S, Banisalam B. Antioxidant activity and total phenolic and flavonoid content of various solvent extracts from *in vivo* and *in vitro* grown *Trifolium pratense* L. (Red Clover). *BioMed Research International*. 2015; 2015.
49. Yahya MA, Nurrosyidah IH. Aktivitas antioksidan ekstrak etanol herba pegagan (*Centella asiatica* (L.) Urban) dengan metode DPPH (2, 2-Difenil-1-Pikrilhidrazil). *Journal of Halal Product and Research*. 2020; 3(2):106–12.
50. Gonelimali FD, Lin J, Miao W, Xuan J, Charles F, Chen M, et al. Antimicrobial properties and mechanism of action of some plant extracts against food pathogens and spoilage microorganisms. *Frontiers in microbiology*. 2018; 9:1639. <https://doi.org/10.3389/fmicb.2018.01639> PMID: 30087662
51. Razmavar S, Abdulla MA, Ismail SB, Hassandarvish P. Antibacterial activity of leaf extracts of *Baeckea frutescens* against methicillin-resistant *Staphylococcus aureus*. *BioMed Research International*. 2014; 2014. <https://doi.org/http%3A//dx.doi.org/10.1155/2014/521287> PMID: 25028658
52. Sekarwana N. Protective effect of ethanolic extract *Sonchus arvensis* L. in gentamicin-induced acute tubular necrosis on wistar rats. *Indonesian Journal of Pharmacy*. 2018; 29(2).
53. Valko M, Leibfritz D, Moncol J, Cronin MT, Mazur M, Telser J. Free radicals and antioxidants in normal physiological functions and human disease. *The International Journal of Biochemistry & Cell Biology*. 2007; 39(1):44–84. <https://doi.org/10.1016/j.biocel.2006.07.001> PMID: 16978905
